# Supplementary material for: The Microbiome of the ‘Williams’ Pear Variety Grown in the Organic Orchard and Antifungal Activity by the Autochthonous Bacterial and Yeast Isolates
Source: MDPI journal article supplement (doi:10.3390/microorganisms10071282), 2022-06-24
Supplement: s1 [file s1]

## Supplementary Materials

# The Microbiome of the ‘Williams’ Pear Variety Grown in the Organic Orchard and Antifungal Activity by the Autochthonous Bacterial and Yeast Isolates

Tamara Janakiev <sup>1</sup>, Tanja Berić <sup>1</sup>, Tatjana Stević <sup>2</sup>, Slaviša Stanković <sup>1</sup>, Jasmina Bačić <sup>3</sup>,  
Helena Majstorović <sup>3</sup>, Djordje Fira <sup>1</sup> and Ivica Dimkić <sup>1,\*</sup>

<sup>1</sup> Faculty of Biology, University of Belgrade, Studentski trg 16, 11158 Belgrade, Serbia; tamara.janakiev@bio.bg.ac.rs (T.J.); tanjab@bio.bg.ac.rs (T.B.); slavisas@bio.bg.ac.rs (S.S.); fira@bio.bg.ac.rs (D.F.)

<sup>2</sup> Institute for Medicinal Plants Research “Dr. Josif Pančić”, Tadeuša Koščuška 1, 11000 Belgrade, Serbia; tanjasomosa@gmail.com

<sup>3</sup> PSS “Tamiš” Institute, Agriculture Extension Service Province of Vojvodina, Novoseljski put 33, 26000 Pančevo, Serbia; jasminabacic4691@gmail.com (J.B.); majstorovic@institut-tamis.rs (H.M.)

\* Correspondence: ivicad@bio.bg.ac.rs; Tel./Fax: +381-11-2637364

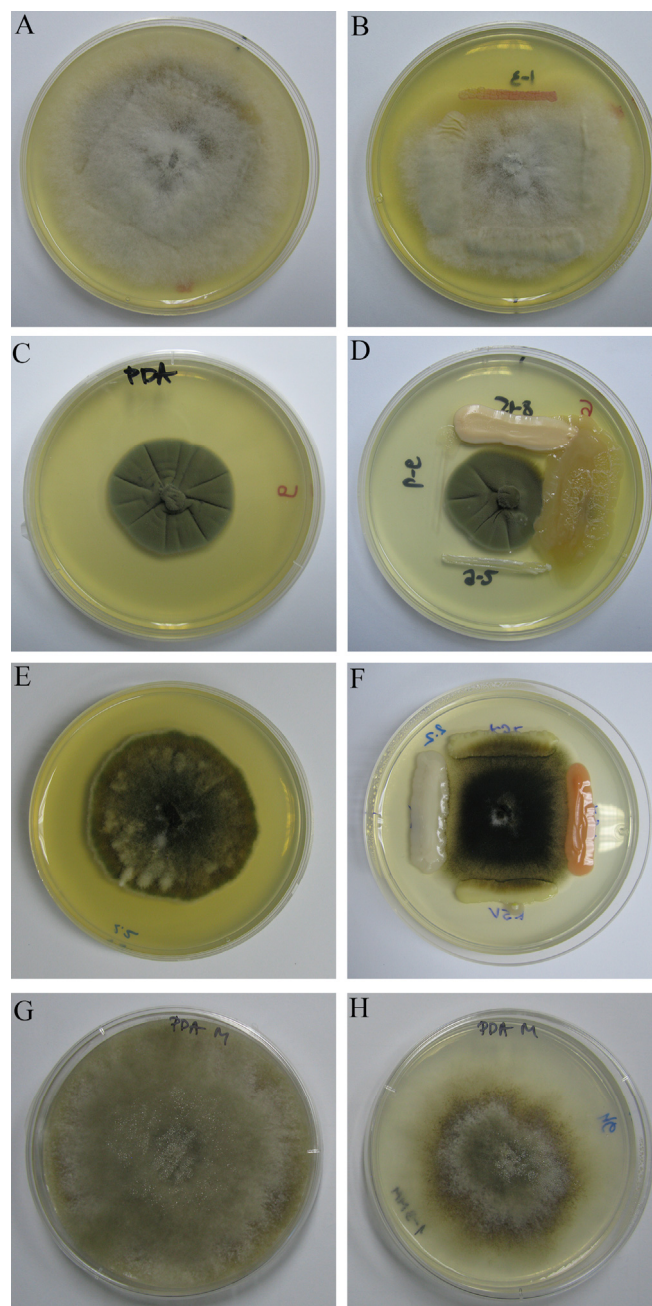

**Figure S1:** Dual culture method for determining the antagonistic potential of bacterial and yeast isolates. The activity of selected isolates against: *Botrytis cinerea* (A – control, B – treatment). *Cladosporium cladosporioides* (C – control, D – treatment), *Alternaria tenuissima* (E – control, F– treatment), and activity of *Hannaella luteola* V1/3 supernatant against *B. cinerea* (G – control, H– treatment) were shown.
